# Supplementary material
Source: publisher site journal article supplement (https://www.dovepress.com/get_supplementary_file.php?f=372750.docx)
Supplement: Supplementary file 1 [file get_supplementary_file.php]

# Supplementary materials

Figure S1 1H NMR spectra of wyc-7-20


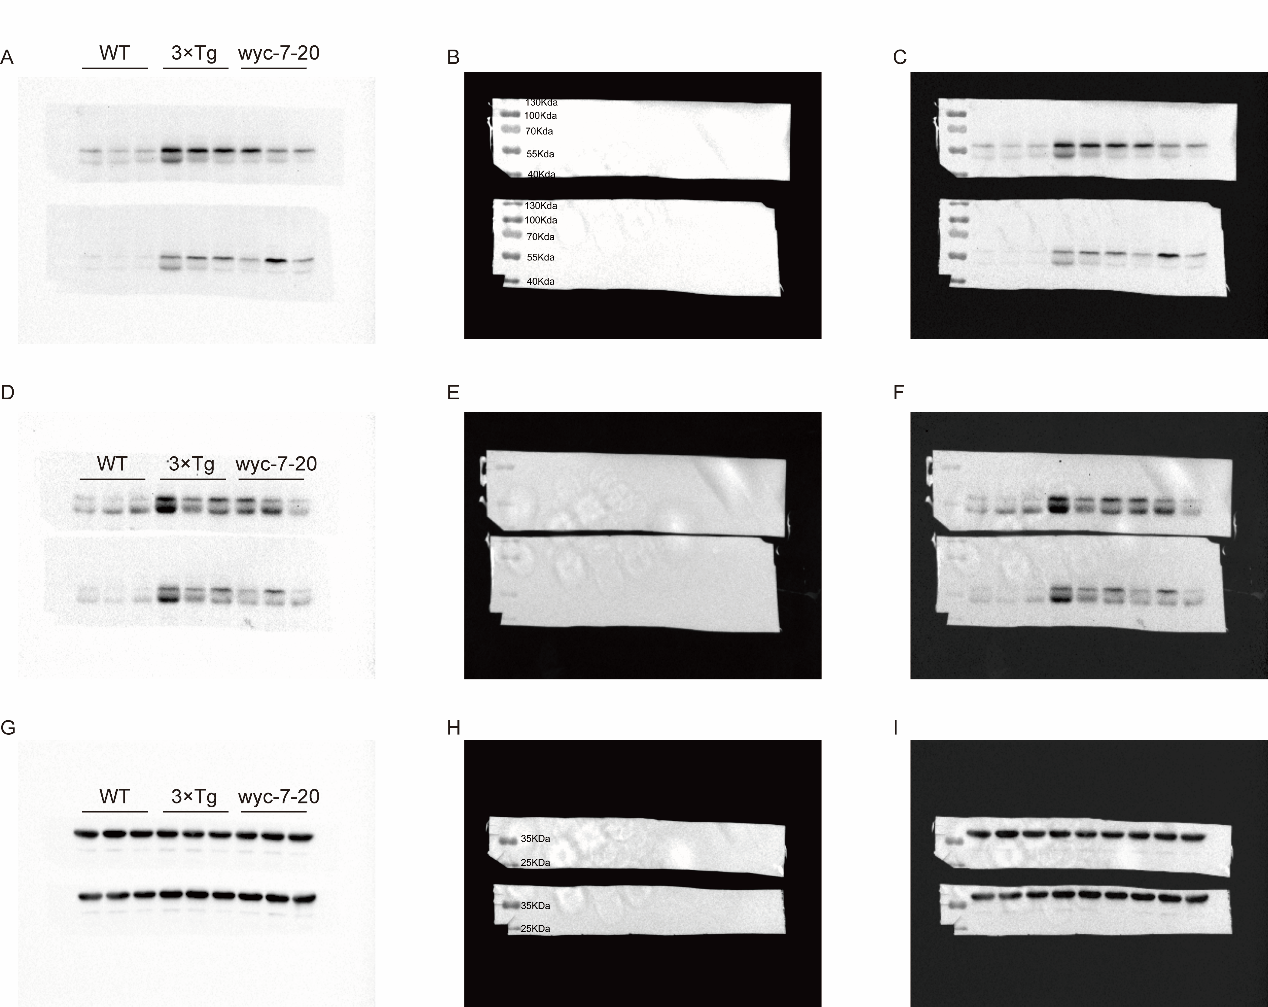


Figure S2 Pathological observation of mice treated with **wyc-7-20**. Phosphorylation of TAU (AT-8 antibody) (A), tau5 (D) and GAPDH (G) were detected by western blot. Western blot marker figures (B, E, H) and the corresponding AT8 merged (C), tau5 merged (F) and GAPDH merged figures were presented.


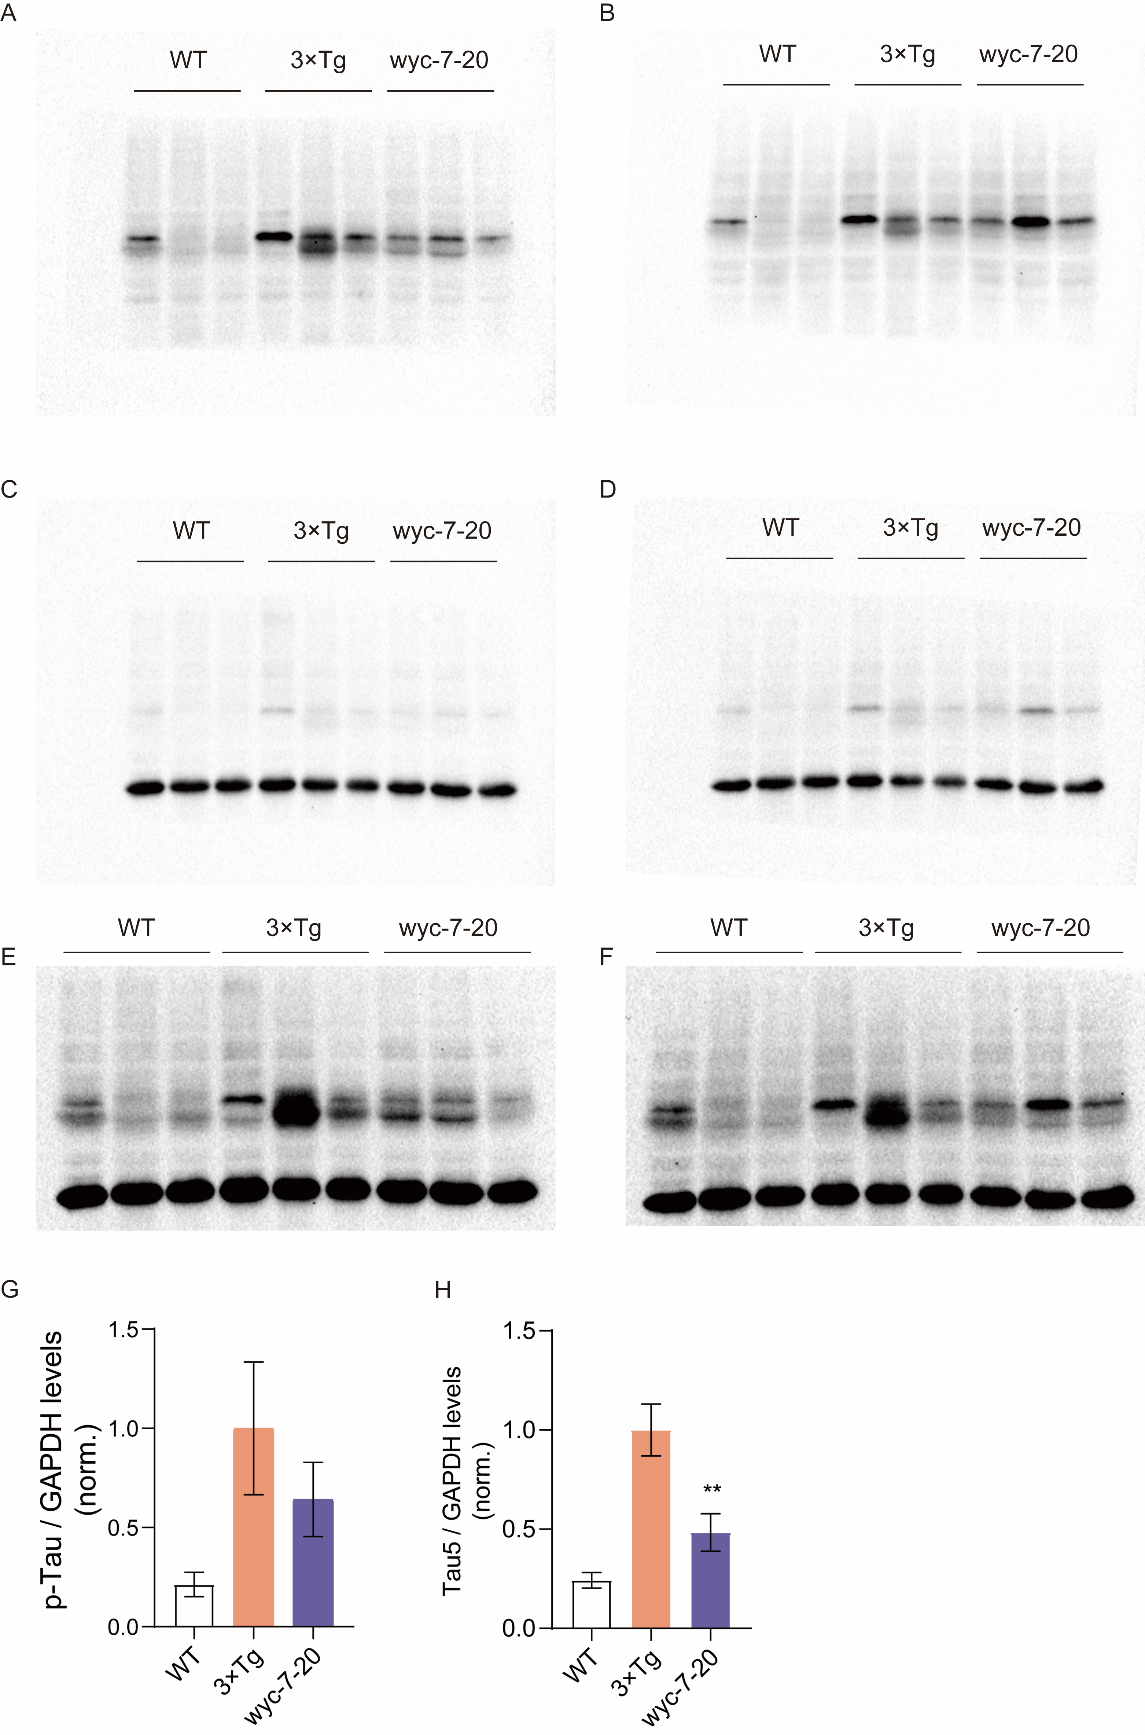


Figure S3 Pathological observation of mice treated with **wyc-7-20**. Phosphorylation of TAU (AT-8 antibody) (A, B), GAPDH (C, D) and tau5 (F, G) were detected by western blot. quantitively analyzed by grey density with Image J software and normalized by GAPDH. n=6, **P＜0.01 **wyc-7-20** treatment vs. 3ⅹTg.
